# Supplementary material for: In-situ measurements reveal significant differences in energy and mass-balance components on monsoon- and westerlies-dominated glaciers in High Mountain Asia
Source: Research Square preprint supplement (doi:10.21203/rs.3.rs-3130900/v1), 2023-07-11
Supplement: Supplementary file 1 [file 2bd00da3769a2d1cb11cd8d5.xlsx]

## Sheet: Table S1
Melt season	Debris-free glacier	Abbreviation	Distribut ed or point	SWnet (%)	LWnet (%)	Qsens (%)	Qlat (%)			Cold season	Debris-free glacier	Abbreviation	Distribut ed or point	SWnet (%)	LWnet (%)	Qsens (%)	Qlat (%)		Mass balance year	Debris-free glacier	Abbreviation	Distribut ed or point	SWnet (%)	LWnet (%)	Qsens (%)	Qlat (%)
1	Muz Taw	MT	point	86.48	89.42	13.52	10.58			1	Muz Taw	MT	point	95.25	82.92	4.75	17.08		1	Muz Taw	MT	point	84.7	80.89	15.3	19.11
2	Urumqi Glacier No.1	UG1	point (distributed)	88.92 (93.63)	89.58 (87.44)	11.08 (6.37)	10.42 (12.56)			2	Urumqi Glacier No.1	UG1	point (distributed)	77.79 (86.00)	74.79 (65.31)	22.21 (14.00)	25.21 (34.69)		2	Urumqi Glacier No.1	UG1	point (distributed)	82.69 (93.44)	79.37 (61.53)	17.31 (6.56)	20.63 (38.46)
3	Fan-shaped Diffluence	SF	point	88.63	79.72	11.37	20.28			3	Fan-shaped Diffluence	SF	point	85.32	83.57	14.68	16.43		3	Fan-shaped Diffluence	SF	point	87.1	82.36	12.9	17.64
4	Muji	MJ	distributed	98.85	56.9	1.15	43.1			4	Muji	Muji	distributed	86	65.31	14	34.69		4	Muji	MJ	distributed	93.44	61.54	6.35	38.46
5	Muztag Ata No. 15	MZ	distributed	84.95	63.95	15.05	36.05			5	Muztag Ata No. 15	MZ 15	distributed	76.19	75.29	23.81	24.71		5	Muztag Ata No. 15	MZ	distributed	79.31	71.76	20.69	28.24
6	Guliya ice cap	GIC	distributed	98.63	74.55	1.37	25.45			6	Guliya ice cap	GIC	distributed	71.31	85.48	27.69	14.52		6	Guliya ice cap	GIC	distributed	82.09	82.54	17.91	17.46
7	Keqicar	KQC	point	52.8302		23.4501	23.7197			7	Xiao Anglong	XA	distributed	82.3	84.5	17.7	15.5		7	Purogangri ice cap	PIC	distributed	56.25	63.93	43.75	36.07
8	Xiao Anglong	XA	distributed	95.6	74.4	4.4	25.6			8	Qiangtang No.1	QT	point	51.4	81.6	48.6	18.4		8	Abramov	ABM	point	79.61	96.55	20.39	3.45
9	Laohugou glacier No. 12	LHG	point (distributed)	86.56 (97.14)	72.58 (75.59)	13.33 (2.86)	27.42 (24.41)			9	Naimona'nyi Glacier	NN	distributed	80.2	79.8	19.8	20.2		9	Xiao Anglong	XA	distributed	83.75	80.95	13.25	19.05
10	Bailanghe glacier No. 21	BLH	distributed	95.77	70.29	4.23	24.71			10	Chhota Shigri	CHS	point	50.8772	66.66	49.1228	33.33		10	Qiyi	QY	distributed	93.1	73.77	6.9	26.23
11	Qiangtang No.1	QT	point	88.8	71	11.3	29			11	Dongkemadi	DKMD	distributed	69.4	87.5	30.6	12.5		11	Bayi	BY	distributed	65.5018		10.4839	12.0968
12	Naimona'nyi Glacier	NN	distributed	96.8	85.9	3.2	14.1			12	Parlung No. 4	PL04	distributed	87.34	70.73	12.66	29.27		12	Ningchan No.1	NC	distributed	93.26	91.67	6.74	8.33
13	Chhota Shigri	CHS	point	86.7	56	13.3	44			13	Zhadang	ZD	distributed	69.7	86.76	30.3	13.24		13	Qiangtang No.1	QT	distributed	65.33	78.87	34.67	21.13
14	Dongkemadi	DKMD	distributed	89.04	86.67	10.96	13.33				Average cold season			75.62 (76.25)	78.84 (78.11)	24.30 (23.67)	21.16 (21.89)		14	Naimona'nyi Glacier	NN	distributed	86.52	81.18	13.48	18.82
15	Parlung No. 4	PL04	distributed	87.74	62.16	12.26	37.84				Maximum value			95.25	87.5	49.1228	34.69		15	Sutri Dhaka	SUD	distributed	95.73	94.44	4.27	5.56
16	Zhadang	ZD	distributed	91.09	83.93	8.91	16.07				Minimum value			50.8772	65.31	12.66	12.5		16	Dongkemadi	DKMD	distributed	80	87.23	20	12.8
17	Yala	YAL	point	99.3655	100	0.634518	0				Westerlies dominated glaciers			82.0 (83.3)	77.9 (76.3)	17.9 (16.5)	22.1 (23.7)		17	Parlung No. 4	PL04	distributed	87.5	68.66	12.5	31.34
	Average melt season			89.8 (90.1)	76.3 (76.1)	8.8 (8.5)	23.5 (23.6)				Transition between westerlies and monsoon dominated glaciers			66.8354	80.012	33.1646	19.986		18	Zhadang	ZD	distributed	83.13	85.25	16.87	14.75
	Maximum value			99.3655	100	23.4501	44				Monsoon dominated glaciers			78.52	78.745	21.48	21.255			Average mass balance year			82.2 (82.8)	80.1 (79.0)	16.3 (15.7)	19.5 (20.5)
	Minimum value			52.8302	56	0.634518	0													Maximum value			95.73	96.55	43.75	38.46
	Westerlies dominated glaciers			85.6 (86.3)	75.7 (75.3)	8.9 (8.1)	24.3 (24.7)													Minimum value			56.25	61.54	4.27	3.45
	Transition between westerlies and monsoon dominated glaciers			92.1183	74.0433	7.89833	25.1233													Westerlies dominated glaciers			80.6 (82.0)	77.4 (75.1)	19.3 (18.0)	22.6 (24.9)
	Monsoon dominated glaciers			92.7318	82.03	7.26817	17.97													Transition between westerlies and monsoon dominated glaciers			82.899	84.0157	13.7242	15.5021
																				Monsoon dominated glaciers			85.315	76.955	14.685	23.045
Melt season	Debris-free glacier	Abbreviation	Distribut ed or point	SWnet (%)	LWnet (%)	Qsens (%)	Qlat (%)			Cold season	Debris-free glacier	Abbreviation	Distribut ed or point	SWnet (%)	LWnet (%)	Qsens (%)	Qlat (%)		Mass balance year	Debris-free glacier	Abbreviation	Distribut ed or point	SWnet (%)	LWnet (%)	Qsens (%)	Qlat (%)
1	Muz Taw	MT	point	86.48	89.42	13.52	10.58			1	Muz Taw	MT	point	95.25	82.92	4.75	17.08		1	Muz Taw	MT	point	84.7	80.89	15.3	19.11
2	Urumqi Glacier No.1	UG1	point	88.92	89.58	11.08	10.42			2	Urumqi Glacier No.1	UG1	point	77.79	74.79	22.21	25.21		2	Urumqi Glacier No.1	UG1	point	82.69	79.37	17.31	20.63
3	Fan-shaped Diffluence	SF	point	88.63	79.72	11.37	20.28			3	Fan-shaped Diffluence	SF	point	85.32	83.57	14.68	16.43		3	Fan-shaped Diffluence	SF	point	87.1	82.36	12.9	17.64
4	Keqicar	KQC	point	52.8302		23.4501	23.7197			4	Qiangtang No.1	QT	point	51.4	81.6	48.6	18.4		8	Abramov	ABM	point	79.61	96.55	20.39	3.45
5	Qiangtang No.1	QT	point	88.8	71	11.3	29			5	Chhota Shigri	CHS	point	50.8772	66.66	49.1228	33.33			Average mass balance year			83.525	84.7925	16.475	15.2075
6	Chhota Shigri	CHS	point	86.7	56	13.3	44				Average cold season			72.1274	77.908	27.8726	22.09
7	Yala	YAL	point	99.3655	100	0.634518	0
	Average melt season			84.5322	80.9533	12.0935	19.7142
Melt season	Debris-free glacier	Abbreviation	Distribut ed or point	SWnet (%)	LWnet (%)	Qsens (%)	Qlat (%)			Cold season	Debris-free glacier	Abbreviation	Distribut ed or point	SWnet (%)	LWnet (%)	Qsens (%)	Qlat (%)		Mass balance year	Debris-free glacier	Abbreviation	Distribut ed or point	SWnet (%)	LWnet (%)	Qsens (%)	Qlat (%)
2	Urumqi Glacier No.1	UG1	distributed	93.6307	87.4364	6.36927	12.5636			1	Urumqi Glacier No.1	UG1	distributed	86	65.3061	14	34.6939		1	Urumqi Glacier No.1	UG1	distributed	93.4426	61.5385	6.55738	38.4615
4	Muji	MJ	distributed	98.85	56.9	1.15	43.1			2	Muji	Muji	distributed	86	65.31	14	34.69		2	Muji	MJ	distributed	93.44	61.54	6.35	38.46
5	Muztag Ata No. 15	MZ	distributed	84.95	63.95	15.05	36.05			3	Muztag Ata No. 15	MZ 15	distributed	76.19	75.29	23.81	24.71		3	Muztag Ata No. 15	MZ	distributed	79.31	71.76	20.69	28.24
6	Guliya ice cap	GIC	distributed	98.63	74.55	1.37	25.45			4	Guliya ice cap	GIC	distributed	71.31	85.48	27.69	14.52		4	Guliya ice cap	GIC	distributed	82.09	82.54	17.91	17.46
8	Xiao Anglong	XA	distributed	95.6	74.4	4.4	25.6			5	Xiao Anglong	XA	distributed	82.3	84.5	17.7	15.5		5	Purogangri ice cap	PIC	distributed	56.25	63.93	43.75	36.07
9	Laohugou glacier No. 12	LHG	distributed	97.14	75.59	2.86	24.41			6	Naimona'nyi Glacier	NN	distributed	80.2	79.8	19.8	20.2		6	Xiao Anglong	XA	distributed	83.75	80.95	13.25	19.05
10	Bailanghe glacier No. 21	BLH	distributed	95.77	70.29	4.23	24.71			7	Dongkemadi	DKMD	distributed	69.4	87.5	30.6	12.5		7	Qiyi	QY	distributed	93.1	73.77	6.9	26.23
12	Naimona'nyi Glacier	NN	distributed	96.8	85.9	3.2	14.1			8	Parlung No. 4	PL04	distributed	87.34	70.73	12.66	29.27		8	Bayi	BY	distributed	65.5018		10.4839	12.0968
13	Dongkemadi	DKMD	distributed	89.04	86.67	10.96	13.33			9	Zhadang	ZD	distributed	69.7	86.76	30.3	13.24		9	Ningchan No.1	NC	distributed	93.26	91.67	6.74	8.33
14	Parlung No. 4	PL04	distributed	87.74	62.16	12.26	37.84				Average cold season			78.7156	77.8529	21.1733	22.1471		10	Qiangtang No.1	QT	distributed	65.33	78.87	34.67	21.13
15	Zhadang	ZD	distributed	91.09	83.93	8.91	16.07												11	Naimona'nyi Glacier	NN	distributed	86.52	81.18	13.48	18.82
	Average melt season			93.5673	74.7069	6.43266	24.8385												12	Dongkemadi	DKMD	distributed	80	87.23	20	12.8
																			13	Parlung No. 4	PL04	distributed	87.5	68.66	12.5	31.34
																			14	Zhadang	ZD	distributed	83.13	85.25	16.87	14.75
																			15	Sutri Dhaka	SUD	distributed	95.73	94.44	4.27	5.56
																				Average mass balance year			82.557	77.3806	15.6281	21.9199

## Sheet: Table S2
		Urumqi Glacier No.1												Urumqi Glacier No.1
	2018-2021 mass balance year		melt season		percentage	cold season		percentage	annual		percentage		2011-2017 mass balance year		melt season		percentage	cold season		percentage	annual		percentage
	Point	SWnet	114.707	128.993	0.889245	63.8533	82.0867	0.777877	80.81	64.5067	1.25274		Distributed	SWnet	148.18	158.26	0.936307	43	50	0.86	57	61	0.934426
		Hsen	14.2867	128.993	0.110755	18.2333	82.0867	0.222123	16.92	97.73	0.17313			Hsen	10.08	158.26	0.0636927	7	50	0.14	4	61	0.0655738
		LWnet	-65.83	-73.4833	0.895849	-61.19	-81.8167	0.747892	-62.74	-79.0433	0.793742			LWnet	-41.27	-47.2	0.874364	-32	-49	0.653061	-32	-52	0.615385
		Hlat	-7.65333	-73.4833	0.104151	-20.6267	-81.8167	0.252108	-16.3033	-79.0433	0.206258			Hlat	-5.93	-47.2	0.125636	-17	-49	0.346939	-20	-52	0.384615
		G	-2.99667			-12.5633			-9.37					G	-3.41			3			2
		Fan-shaped Diffluence
	2018-2021mass balance year		melt season		percentage	cold season		percentage	annual		percentage
	Point	SWnet	172.709	194.86	0.886321	71.1073	83.3457	0.85316	104.974	120.517	0.871033
		Hsen	22.1515	194.86	0.113679	12.2385	83.3457	0.14684	15.5428	120.517	0.128967
		LWnet	-60.366	-75.7263	0.797161	-69.313	-82.9442	0.835658	-66.3306	-80.5382	0.823592
		Hlat	-15.3603	-75.7263	0.202839	-13.6312	-82.9442	0.164342	-14.2076	-80.5382	0.176408
		G	0.0506538			-12.403			-8.25176
		Muz Taw
	2018-2021 mass balance year		melt season		percentage	cold season		percentage	annual		percentage
	Point	SWnet	122.661	141.841	0.864778	109.97	115.456	0.952484	78.7519	92.9733	0.847037
		Hsen	19.18	141.841	0.135222	5.486	115.456	0.0475161	14.2214	92.9733	0.152963
		LWnet	-64.6901	-72.3405	0.894244	-83.6945	-100.935	0.829195	-16.3021	-85.308	0.191097
		Hlat	-7.65041	-72.3405	0.105756	-17.2401	-100.935	0.170805	-9.13341	-94.4414	0.0967098
		G	-4.77842			-8.3434			19.567
		Muji
	2011-2017 mass balance year		melt season		percentage	cold season		percentage	annual		percentage
	Distributed	SWnet	86	87	0.988506	43	50	0.86	57	61	0.934426
		Hsen	1	87	0.0114943	7	50	0.14	4	61	0.0655738
		LWnet	-33	-58	0.568966	-32	-49	0.653061	-32	-52	0.615385
		Hlat	-25	-58	0.431034	-17	-49	0.346939	-20	-52	0.384615
		G	0	87	0	3	53	0.0566038	2	63	0.031746
		Muztag Ata No. 15
	2003-2008 mass balance year	mushitage	melt season		percentage	cold season		percentage	annual		percentage
	Distributed	SWnet	79	93	0.849462	64	84	0.761905	69	87	0.793103
		Hsen	14	93	0.150538	20	84	0.238095	18	87	0.206897
		LWnet	-55	-86	0.639535	-64	-85	0.752941	-61	-85	0.717647
		Hlat	-31	-86	0.360465	-21	-85	0.247059	-24	-85	0.282353
		G	-2	-88	0.0227273	1	85	0.0117647	0		0
		Guliya
	2015-2016 mass balance year		melt season		percentage	cold season		percentage	annual		percentage
	Distributed	SWnet	72	73	0.986301	47	65	0.723077	55	67	0.820896
		Hsen	1	73	0.0136986	18	65	0.276923	12	67	0.179104
		LWnet	-41	-55	0.745455	-53	-62	0.854839	-52	-63	0.825397
		Hlat	-14	-55	0.254545	-9	-62	0.145161	-11	-63	0.174603
		G	-3	-58	0.0517241	1	66	0.0151515	0
	1968-2019 mass balance year	Xiao Anglong Glacier
			melt season		percentage	cold season		percentage	annual		percentage
	Distributed	SWnet	86	90	0.955556	65	79	0.822785	72	83	0.86747
		Hsen	4	90	0.0444444	14	79	0.177215	11	83	0.13253
		LWnet	-61	-82	0.743902	-71	-84	0.845238	-68	-84	0.809524
		Hlat	-21	-82	0.256098	-13	-84	0.154762	-16	-84	0.190476
		G	-1	-83	0.0120482	4	-84	-0.047619	3	86	0.0348837
	2001-2011 mass balance year	PIC
			melt season		percentage	cold season		percentage	annual		percentage
	Distributed	SWnet							36	64	0.5625
		Hsen							28	64	0.4375
		LWnet							-39	-61	0.639344
		Hlat							-22	-61	0.360656
		G							-1.3	-62.3	0.0208668
		Laohugou Glacier No.12												Laohugou glacier No.12
	June 1-September 30, 2012		melt season		percentage	cold season		percentage	annual		percentage		September 2020 to August 2021		melt season		percentage	cold season		percentage	annual		percentage
	Point	SWnet	43.8	50.6	0.865613								Distributed	SWnet	80.325	82.6917	0.97138
		Qsens	6.8	51	0.133333									Hsen	2.36667	82.6917	0.0286204
		LWnet	45	62	0.725806									LWnet	-35	-46.3	0.75594
		Qlat	17	62	0.274194									Hlat	-11.3	-46.3	0.24406
														G	-2.1
	September 2020 - August 2021	Bailanghe glacier No. 21
			melt season		percentage	cold season		percentage	annual		percentage
	Distributed	SWnet	69.55	72.625	0.957659
		Hsen	3.075	72.625	0.0423408
		LWnet	-19.2	-25.5	0.752941
		Hlat	-6.3	-25.5	0.247059
		G	-1.7
	2012-2016 mass balance year	Qiangtang Glacier No.1				3
			melt season		percentage	cold season		percentage	annual		percentage
	Point	SWnet	71	80	0.8875	37	72	0.513889	0	26	0
		Hsen	9	80	0.1125	35	72	0.486111	26	75	0.346667
		LWnet	44	62	0.709677	62	76	0.815789	0	-15	0
		Hlat	18	62	0.290323	14	76	0.184211	-15	-71	0.211268
		G	0			3	75	0.04	2	77	0.025974
	2010-2018 mass balance year	Naimona'nyi Glacier.
			melt season		percentage	cold season		percentage	annual		percentage
	Distributed	SWnet	92	95	0.968421	69	86	0.802326	77	89	0.865169
		Hsen	3	95	0.0315789	17	86	0.197674	12	89	0.134831
		LWnet	67	78	0.858974	71	89	0.797753	69	85	0.811765
		Hlat	11	78	0.141026	18	89	0.202247	16	85	0.188235
		G	1	96	0.0104167	3	89	0.0337079	2	77	0.025974
	1970-2015 mass balance year	Qiyi
			melt season		percentage	cold season		percentage	annual		percentage
	Distributed	SWnet							81	87	0.931034
		Hsen							6	87	0.0689655
		LWnet							45	61	0.737705
		Hlat							16	61	0.262295
		G							3	90	0.0333333
	1970-2015 mass balance year	Ningchan No.1
			melt season		percentage	cold season		percentage	annual		percentage
	Distributed	SWnet							83	89	0.932584
		Hsen							6	89	0.0674157
		LWnet							44	48	0.916667
		Hlat							4	48	0.0833333
		G							4	93	0.0430108
	1992-1993 mass balance year	Dongkemadi Glacier
			melt season		percentage	cold season		percentage	annual		percentage
	Distributed	SWnet	65	73	0.890411	34	49	0.693878	48	60	0.8
		Hsen	8	73	0.109589	15	49	0.306122	12	60	0.2
		LWnet	39	45	0.866667	42	48	0.875	41	47	0.87234
		Hlat	6	45	0.133333	6	48	0.125	6	47	0.12766
		G	1.2			0.9			0.1
		Sutri Dhaka
	October 2015 to September 2017		melt season		percentage	cold season		percentage	annual		percentage
	Distributed	SWnet							157	164	0.957317
		Hsen							7	164	0.0426829
		LWnet							-85	-90	0.944444
		Hlat							-5	-90	0.0555556
		G							-3	-93	0.0322581
		Abmove
	1968-2020 mass balance year		melt season		percentage	cold season		percentage	annual		percentage
	Point	SWnet							73.14	91.87	0.796125
		Hsen							18.73	91.87	0.203875
		LWnet							-48.2	-49.92	0.965545
		Hlat							-1.72	-49.92	0.0344551
		G							3.36
		Keqicar
	June-September, 2005		melt season		percentage	cold season		percentage	annual		percentage
	Point	SWnet	98	185.5	0.528302
		Hsen	-43.5	185.5	0.234501
		Hlat	-44	185.5	0.237197
		Qingbingtan Glacier No.72
	July 30 -August 29, 2008		melt season		percentage	cold season		percentage	annual		percentage
	Point	SWnet	185.2	185.2	1
		LWnet	36.6	137.2	0.266764
		Qsens	92	137.2	0.670554
		Qlat	8.6	137.2	0.0626822
		M=QG	48
		Zhadang
	October,2001-September, 2011		melt season		percentage	cold season		percentage	annual		percentage
	Distributed	SWnet	92	101	0.910891	46	66	0.69697	69	83	0.831325
		Hsen	9	101	0.0891089	20	66	0.30303	14	83	0.168675
		LWnet	-47	-56	0.839286	-59	-68	0.867647	-52	-61	0.852459
		Hlat	-9	-56	0.160714	-9	-68	0.132353	-9	-61	0.147541
		G	-3			2			-1
		Palung No.4 glacier
	October 2005 - October 2010		melt season		percentage	cold season		percentage	annual		percentage
	Distributed	SWnet	93	106	0.877358	69	79	0.873418	77	88	0.875
		Hsen	13	106	0.122642	10	79	0.126582	11	88	0.125
		LWnet	-23	-37	0.621622	-58	-82	0.707317	-46	-67	0.686567
		Hlat	-14	-37	0.378378	-24	-82	0.292683	-21	-67	0.313433
		G	-7			5			1
		Chhota Shigri
	October 2012 -September 2013		melt season		percentage	cold season		percentage	annual		percentage
	Point	SWnet	202	233	0.866953	29	57	0.508772
		Hsen	31	233	0.133047	28	57	0.491228
		LWnet	14	25	0.56	54	81	0.666667
		Hlat	11	25	0.44	27	81	0.333333
		G	4			0

## Sheet: Table S3
Melt season	Debris-covered glaciier	Name	Distribut ed or point	SWnet (%)	LWnet (%)	Qsens (%)	Qlat (%)
1	Qingbingtan No.72	QBT	point	100	26.6764	67.0554	6.26822
2	Langtang	LAN	point	100	10.55	45.1	29.08
3	Changri Nup	CNU	point	100	14.526	13.3027	27.6758
4	Hailuogou	HAI	point	67.782	1.2952	13.8694	17.0534
5	24K	24K	point	100	10.6332	24.5529	25.4712
6	Lirung	LIR	point	100	15.8602	32.5269	27.1505

## Sheet: Table S4
Melt season	Debris-free glacier	Abbreviation	Distribut ed or point	Melt (%)	Sublimation (%)	Snowfall (%)	Refreezing (%)		Cold season	Debris-free glacier	Abbreviation	Distribut ed or point	Melt (%)	Sublimation (%)	Snowfall (%)	Refreezing (%)		Mass balance year	Debris-free glacier	Abbreviation	Distribut ed or point	Melt (%)	Sublimation (%)	Snowfall (%)	Refreezing (%)
1	Muz Taw	MT	point	87.4	12.6	92.5	7.5		1	Muz Taw	MT	point	0	100	100	0		1	Muz Taw	MT	point	75.7	24.3	94.3	5.7
2	Urumqi Glacier No.1	UG1	point (distributed)	97.5 (98.0)	2.5 (3.0)	96.3 (99.6)	3.7 (0.43)		2	Urumqi Glacier No.1	UG1	point	6.7	93.3	95.6	4.4		2	Urumqi Glacier No.1	UG1	point	86.7	13.3	96	4
3	Fan-shaped Diffluence	SF	point	95	5	91	9		3	Fan-shaped Diffluence	SF	point	0	100	100	0		3	Fan-shaped Diffluence	SF	point	65.2	34.8	94.2	5.8
4	Muji	MJ	distributed	84	16	54	46		4	Muji	MJ	distributed	7	93	96	4		4	Muji	MJ	distributed	72	28	68	32
5	Muztag Ata No. 15	MZ	distributed	51	49	91	9		5	Muztag Ata No. 15	MZ	distributed	0	100	100	0		5	Muztag Ata No. 15	MZ	distributed	34	66	94	6
6	Guliya	GIC	distributed	87	13	74	26		6	Guliya	GIC	distributed	0	100	100	0		6	Guliya	GIC	distributed	76	24	79	21
7	Xiao Anglong Glacier	XA	distributed	75	25	77	23		7	Xiao Anglong Glacier	XA	distributed	0	100	98	2		7	Xiao Anglong Glacier	XA	distributed	57	43	80	20
8	Qiangtang No.1	QT	point	88	12	74	26		8	Qiangtang No.1	QT	point	0	100	100	0		8	Purogangri ice cap	PIC	distributed	40	60	91	9
9	Naimona'nyi Glacier.	NN	distributed	93	7	78	22		9	Naimona'nyi Glacier.	NN	distributed	0	100	100	0		9	Qiangtang No.1	QT	point	75	25	78	22
10	Qiyi	QY	distributed	90	10	71	29		10	Qiyi	QY	distributed	27	73	96	4		10	Naimona'nyi Glacier.	NN	distributed	76	24	83	17
11	Laohugou glacier No. 12	LHG	point (distributed)	96 (89)	4 (11)	49 (48.8)	51 (51.2)		11	Laohugou No.12	LHG	distributed	45.1	54.9	85.6	14.4		11	Qiyi	QY	distributed	82	18	76	24
12	Bailanghe glacier No. 21	BLH	distributed	98	2	45	55		12	Bailanghe No.21	BLH	distributed	82.09	17.91	91.77	8.23		12	Laohugou No.12	LHG	distributed	90.51	9.49	55.57	44.43
13	Ningchan No.1	NC	distributed	99	1	68	32		13	Ningchan No.1	NC	distributed	44	56	88	12		13	Bailanghe No.21	BLH	distributed	93.48	6.52	64.8	35.2
14	Parlung No. 4	PL04	distributed	98	2	81	19		14	Parlung No. 4	PL04	distributed	48	52	93	7		14	Ningchan No.1	NC	distributed	96	4	75	25
15	Zhadang	ZD	distributed	98	2	89	11		15	Zhadang	ZD	distributed	37	63	85	15		15	Parlung No. 94	PL94	distributed	97	3	78	22
	Average melt season			89.1267	10.8733	75.3867	24.6133			Average melt season			19.7927	80.2073	95.2647	4.73533		16	Parlung No. 4	PL04	distributed	93	7	89	11
	Maximum value			99	49	96.3	55			Maximum value			82.09	100	100	15		17	Zhadang	ZD	distributed	93	7	42	58
	Minimum value			51	1	45	3.7			Minimum value			0	17.91	85	0			Average mass balance year			76.6229	23.3771	78.6982	21.3018
	Westerlies dominated glaciers			83.7 (83.7)	16.4 (16.4)	83.1 (83.7)	16.9 (16.3)			Westerlies dominated glaciers			2.28333	97.7167	98.6	1.4			Maximum value			97	66	96	58
	Transition between westerlies and monsoon dominated glaciers			91.3 (90.3)	8.7 (9.7)	66.0 (66.0)	34.0 (34.0)			Transition between westerlies and monsoon dominated glaciers			28.3129	71.6871	94.1957	5.80429			Minimum value			34	3	42	4
	Monsoon dominated glaciers			98	2	85	15			Monsoon dominated glaciers			42.5	57.5	89	11			Westerlies dominated glaciers			68.2667	31.7333	87.5833	12.4167
																			Transition between westerlies and monsoon dominated glaciers			76.2488	23.7513	75.4213	24.5787
																			Monsoon dominated glaciers			94.3333	5.66667	69.6667	30.3333
Melt season	Debris-free glacier	Abbreviation	Distribut ed or point	Melt (%)	Sublimation (%)	Snowfall (%)	Refreezing (%)		Cold season	Debris-free glacier	Abbreviation	Distribut ed or point	Melt (%)	Sublimation (%)	Snowfall (%)	Refreezing (%)		Mass balance year	Debris-free glacier	Abbreviation	Distribut ed or point	Melt (%)	Sublimation (%)	Snowfall (%)	Refreezing (%)
1	Muz Taw	MT	point	87.4	12.6	92.5	7.5		1	Muz Taw	MT	point	0	100	100	0		1	Muz Taw	MT	point	75.7	24.3	94.3	5.7
2	Urumqi Glacier No.1	UG1	point (distributed)	97.5	2.5	96.3	3.7		2	Urumqi Glacier No.1	UG1	point	6.7	93.3	95.6	4.4		2	Urumqi Glacier No.1	UG1	point	86.7	13.3	96	4
3	Fan-shaped Diffluence	SF	point	95	5	91	9		3	Fan-shaped Diffluence	SF	point	0	100	100	0		3	Fan-shaped Diffluence	SF	point	65.2	34.8	94.2	5.8
4	Qiangtang No.1	QT	point	88	12	74	26		4	Qiangtang No.1	QT	point	0	100	100	0		4	Qiangtang No.1	QT	point	75	25	78	22
5	Laohugou glacier No. 12	LHG	point	96	4	49	51			Average cold season			1.675	98.325	98.9	1.1			Average mass balance year			75.65	24.35	90.625	9.375
	Average melt season			92.78	7.22	80.56	19.44
Melt season	Debris-free glacier	Abbreviation	Distribut ed or point	Melt (%)	Sublimation (%)	Snowfall (%)	Refreezing (%)		Cold season	Debris-free glacier	Abbreviation	Distribut ed or point	Melt (%)	Sublimation (%)	Snowfall (%)	Refreezing (%)		Mass balance year	Debris-free glacier	Abbreviation	Distribut ed or point	Melt (%)	Sublimation (%)	Snowfall (%)	Refreezing (%)
1	Urumqi Glacier No.1	UG1	distributed	98	3	99.6	0.43		1	Muji	MJ	distributed	7	93	96	4		4	Muji	MJ	distributed	72	28	68	32
2	Muji	MJ	distributed	84	16	54	46		2	Muztag Ata No. 15	MZ	distributed	0	100	100	0		5	Muztag Ata No. 15	MZ	distributed	34	66	94	6
3	Muztag Ata No. 15	MZ	distributed	51	49	91	9		3	Guliya	GIC	distributed	0	100	100	0		6	Guliya	GIC	distributed	76	24	79	21
4	Guliya	GIC	distributed	87	13	74	26		4	Xiao Anglong Glacier	XA	distributed	0	100	98	2		7	Xiao Anglong Glacier	XA	distributed	57	43	80	20
5	Xiao Anglong Glacier	XA	distributed	75	25	77	23		5	Qiangtang No.1	QT	point	0	100	100	0		8	Purogangri ice cap	PIC	distributed	40	60	91	9
6	Naimona'nyi Glacier.	NN	distributed	93	7	78	22		6	Naimona'nyi Glacier.	NN	distributed	0	100	100	0		10	Naimona'nyi Glacier.	NN	distributed	76	24	83	17
7	Qiyi	QY	distributed	90	10	71	29		7	Qiyi	QY	distributed	27	73	96	4		11	Qiyi	QY	distributed	82	18	76	24
8	Laohugou glacier No. 12	LHG	distributed	89	11	48.8	51.2		8	Laohugou No.12	LHG	distributed	45.1	54.9	85.6	14.4		12	Laohugou No.12	LHG	distributed	90.51	9.49	55.57	44.43
9	Bailanghe glacier No. 21	BLH	distributed	98	2	45	55		9	Bailanghe No.21	BLH	distributed	82.09	17.91	91.77	8.23		13	Bailanghe No.21	BLH	distributed	93.48	6.52	64.8	35.2
10	Ningchan No.1	NC	distributed	99	1	68	32		10	Ningchan No.1	NC	distributed	44	56	88	12		14	Ningchan No.1	NC	distributed	96	4	75	25
11	Parlung No. 4	PL04	distributed	98	2	81	19		11	Parlung No. 4	PL04	distributed	48	52	93	7		15	Parlung No. 94	PL94	distributed	97	3	78	22
12	Zhadang	ZD	distributed	98	2	89	11		12	Zhadang	ZD	distributed	37	63	85	15		16	Parlung No. 4	PL04	distributed	93	7	89	11
	Average melt season			88.3333	11.75	73.0333	26.9692			Average cold season			24.1825	75.8175	94.4475	5.5525		17	Zhadang	ZD	distributed	93	7	42	58
																			Average mass balance year			76.9223	23.0777	75.0285	24.9715
					0.562944

## Sheet: Table S5
	2018-2021 mass balance year	Urumqi Glacier No.1	melt season		percentage	cold season		percentage	annual		percentage
	Point	melt	856	878	0.974943	8	119	0.0672269	864	997	0.8666
		sublimation	22	878	0.0250569	111	119	0.932773	133	997	0.1334
		snow	184	191	0.963351	153	160	0.95625	337	351	0.960114
		refreezing	7	191	0.0366492	7	160	0.04375	14	351	0.039886
	2018-2021 mass balance year	Fan-shaped Diffluence	melt season		percentage	cold season		percentage	annual		percentage
	Point	melt	345	363	0.950413	0	166	0	345	529	0.652174
		sublimation	18	363	0.0495868	166	166	1	184	529	0.347826
		snow	243	267	0.910112	147	147	1	390	414	0.942029
		refreezing	24	267	0.0898876	0	147	0	24	414	0.057971
	2018-2021 mass balance year	Muz Taw	melt season		percentage	cold season		percentage	annual		percentage
	Point	melt	383	438	0.874429	0	68	0	383	506	0.756917
		sublimation	55	438	0.125571	68	68	1	123	506	0.243083
		snow	186	201	0.925373	62	62	1	248	263	0.942966
		refreezing	15	201	0.0746269	0	62	0	15	263	0.0570342
	2011-2017 mass balance year	Muji	melt season		percentage	cold season		percentage	annual		percentage
	Distributed	melt	541	647	0.836167	8	119	0.0672269	549	766	0.71671
		sublimation	106	647	0.163833	111	119	0.932773	217	766	0.28329
		snow	184	339	0.542773	153	160	0.95625	337	499	0.675351
		refreezing	155	339	0.457227	7	160	0.04375	162	499	0.324649
	1980-2012 mass balance year	Muztag Ata No. 15	melt season		percentage	cold season		percentage	annual		percentage
	Distributed	melt	160	311	0.514469	0	166	0	160	477	0.33543
		sublimation	151	311	0.485531	166	166	1	317	477	0.66457
		snow	243	267	0.910112	147	147	1	390	414	0.942029
		refreezing	24	267	0.0898876	0	147	0	24	414	0.057971
	2015-2016 mass balance year	Guliya	melt season		percentage	cold season		percentage	annual		percentage
	Distributed	melt	383	438	0.874429	0	68	0	383	506	0.756917
		sublimation	55	438	0.125571	68	68	1	123	506	0.243083
		snow	186	251	0.741036	62	62	1	248	313	0.792332
		refreezing	65	251	0.258964	0	62	0	65	313	0.207668
	1968-2019 mass balance year	Xiao Anglong Glacier	melt season		percentage	cold season		percentage	annual		percentage
	Distributed	melt	237	316	0.75	0	98	0	237	414	0.572464
		sublimation	79	316	0.25	98	98	1	177	414	0.427536
		snow	240	313	0.766773	47	48	0.979167	287	361	0.795014
		refreezing	73	313	0.233227	1	48	0.0208333	74	361	0.204986
	2001-2011 mass balance year	Purogangri ice cap	melt season		percentage	cold season		percentage	annual		percentage
	Distributed	melt							152	420	0.361905
		sublimation							254	420	0.604762
		subsurface melt							14	420	0.0333333
		solid							342	375	0.912
		refreezing							33	375	0.088
	2012-2016 mass balance year	Qiangtang glacier No.1	melt season		percentage	cold season		percentage	annual		percentage
	Point	snowfall	380	514.75	0.738222	103.75	103.75	1	484	618.75	0.782222
		refreezing	134.75	514.75	0.261778	0	103.75	0	134.75	618.75	0.217778
		melt	532	602.75	0.882621	0	105.25	0	532	707.5	0.751943
		sublimation	70.75	602.75	0.117379	105.25	105.25	1	175.5	707.5	0.248057
	2010-2018 mass balance year	Naimona'nyi Glacier.	melt season		percentage	cold season		percentage	annual		percentage
	Distributed	snowfall	0.21	0.27	0.777778	0.09	0.09	1	0.3	0.36	0.833333
		refreezing	0.06	0.27	0.222222	0	0.09	0	0.06	0.36	0.166667
		sublimation	0.04	0.6	0.0666667	0.14	0.14	1	0.18	0.74	0.243243
		Melt	0.56	0.6	0.933333	0	0.14	0	0.56	0.74	0.756757
	1970-2015 mass balance year	Qiyi	melt season		percentage	cold season		percentage	annual		percentage
	Distributed	snowfall	309	434	0.711982	89	93	0.956989	398	527	0.755218
		refreezing	125	434	0.288018	4	93	0.0430108	129	527	0.244782
		sublimation	64	644	0.0993789	69	94	0.734043	133	738	0.180217
		Melt	580	644	0.900621	25	94	0.265957	605	738	0.819783
	1970-2015 mass balance year	Ningchan No.1	melt season		percentage	cold season		percentage	annual		percentage
	Distributed	snowfall	351	519	0.676301	261	295	0.884746	612	815	0.75092
		refreezing	168	519	0.323699	34	295	0.115254	203	815	0.24908
		sublimation	16	1101	0.0145322	30	54	0.555556	46	1155	0.0398268
		Melt	1085	1101	0.985468	24	54	0.444444	1109	1155	0.960173
	September 2020 to August 2021	Laohugou glacier No.12	melt season		percentage	cold season		percentage	annual		percentage
	Distributed	snowfall	275	564	0.487589	128.299	149.969	0.855502	399.85	719.576	0.555674
		refreezing	289	564	0.512411	21.6702	149.969	0.144498	319.726	719.576	0.444326
		sublimation	43	392	0.109694	67.5498	123.004	0.549166	126	23.0706	5.46149
		Melt	349	392	0.890306	55.4545	123.004	0.450834	-102.929	799.412	-0.128756
	September 2020 to August 2021	Bailanghe glacier No. 21	melt season		percentage	cold season		percentage	annual		percentage
	Distributed	snowfall	273	604	0.451987	253.107	275.795	0.917736	508	784	0.647959
		refreezing	331	604	0.548013	22.6879	275.795	0.0822638	276	784	0.352041
		sublimation	-29	-1224	0.0236928	-40.4639	-225.934	0.179096	-92	-1410.09	0.0652443
		Melt	-1195	-1224	0.976307	-185.47	-225.934	0.820904	-1318.09	-1410.09	0.934756
	2003-2008 mass balance year	Parlung No. 4	melt season		percentage	cold season		percentage	annual		percentage
	Distributed	melt	9914	10126	0.979064	481	993	0.484391	10395	11119	0.934886
		sublimation	212	10126	0.0209362	512	993	0.515609	724	11119	0.0651138
		snow	1473	1808	0.814712	2864	3077	0.930777	4337	4885	0.88782
		refreezing	335	1808	0.185288	213	3077	0.0692233	548	4885	0.11218
	2003-2008 mass balance year	Zhadang	melt season		percentage	cold season		percentage	annual		percentage
	Distributed	melt	9620	9843	0.977344	316	865	0.365318	9936	10708	0.927904
		sublimation	223	9843	0.0226557	549	865	0.634682	772	10708	0.0720956
		snow	1971	2217	0.889039	519	611	0.849427	2490	5867	0.424408
		refreezing	246	2217	0.110961	92	611	0.150573	3377	5867	0.575592
	2006-2010 mass balance year	Parlung No. 94	melt season		percentage	cold season		percentage	annual		percentage
	Distributed	melt							1.72	1.78	0.966292
		sublimation							0.06	1.78	0.0337079
		refreezing							0.22	1	0.22
		snow							0.78	1	0.78

## Sheet: Table S6
	Table S6. Detailed information on the glaciers for mass balance measurement and reconstruction in HMA. Note: 1, 2, and 3 in Method column refer to glaciological, modelled and geodetic mass balance method, respectively.
	N	Name	Mountains	Lat	Lon	Time series	Method	Reference
	1	Muz Taw	Sawir	47.07	85.57	2016-2021	1	Blue Book on Climate Change in China. 2022
	2	Urumqi Glacier No.1	Tianshan	43.12	86.81	1959-2021	1	WGMS. 2021
	3	Haxilegen No. 51	Tianshan	43.72	84.4	1999-2015	2	Zhang et al. 2018
	4	Qingbingtan No. 72	Tianshan	41.75	79.9	1964-2008	3	Wang et al. 2017;
						2008-2014	1	Che et al. 2020
	5	Golubin	Tianshan	42.45	85.56	1969-2021	1	WGMS. 2021
	6	Muztag Ata No. 15	Pamir	38.24	75.06	1980-2012	1 and 2	Zhu et al. 2018
	7	Muji	Pamir	39.19	73.74	2011-2017	3	Zhu et al. 2020
	8	Ts. Tuyuksuyskiy	Pamir	43.04	77.08	1959-2021	1	WGMS. 2021
	9	Abramov	Pamir Alay	39.61	71.55	1968-2020	1 and 2	WGMS. 2021; Kronenberg et al. 2022
	10	Qiyi	Qilian	39.24	97.76	1975-2013	1 and 2	Yao et al. 2012; Liu et al. 2020
	11	Shiyi	Qilian	38.21	99.88	1964-2017	1 and 2	Zhang et al. 2020
	12	Laohugou No.12	Qilian	39.43	96.55	1960-2018	2	Chen et al. 2020
	13	Meikuang	Kunlun	35.67	94.18	1975-2013	1 and 2	Yao et al. 2012; Liu et al. 2020
	14	Hailuogou	Hengduan	29.58	101.93	1975-2013	2	Liu 2020
	15	Xiao Dongkemadi	Tanggula	33.17	92.13	1989-2010	1	WGMS 2021
						1975-2013	2	Liu 2020
	16	Baishui River No. 1	Hengduan	27.12	110.2	1957-2017	1 and 2	Wang et al. 2021
	17	Parlung No. 94	Nyainqentanglha	29.39	96.98	1975-2013	1 and 2	Yao et al. 2012; Liu et al. 2020
	18	Gurenhekou	Nyainqentanglha	30.18	90.47	2003-2010	1	Yao et al. 2012
	19	Purogangri Ice Cap	Karakorum	33.08	89.17	2000-2012	3	Neckel et al. 2013
	20	Kangwure	Himalayas	28.45	85.75	1991-2010	1	Yao et al. 2012
	21	Naimona'nyi	Himalayas	30.45	81.33	2010-2018	1 and 2	Zhu et al. 2021
						1974-2008	2	Zhao et al. 2016

## Sheet: Table S7
	Table S7 Mass loss for 21 glaciers before and after 2000. The values are from glaciological, reconstructed, and geodetic mass balance. The three major climate regimes with green dotted line (monsoon dominated in the south, westerlies dominated in the north, and the transition between westerlies and monsoon dominated) are based on Yao et al. (2013).											Table S7 Changes in the cumulative mass balance of High Mountain Asia glaciers at different times since 1959.
											Year	Urumqi Glacier No.1	Muztagh No.15	Haxilegen Glacier No.51	Muji Glacier	Hailuogou	Parlung No.94	Qiyi	Xiaodongkemadi	Meikuang	Shiyi	Laohugou No.12	Baishui No.1	Naimona’nyi Glacier	Kangwure	Ts． Tuyuksuyskiy	Abramov
	Region		latitude	longitude	Name	Before_200	After_2000				1959	0.087	--	--	--	--	--	--	--	--	--	--	2.2197	--	--	-0.42
	westerlies-dominated region	1	43.12	86.81	Urumqi Glacier No.1	-0.185073	-0.647238				1960	-0.101	--	--	--	--	--	--	--	--	--	--	1.3899	--	--	-0.52
		2	43.731	84.391	Haxilegen No.51	0	-0.378456				1961	-0.134	--	--	--	--	--	--	--	--	--	--	0.976	--	--	-1.08
		3	38.24	75.06	Muztag Ata No.15	-0.132661	0.058476				1962	-0.301	--	--	--	--	--	--	--	--	--	--	1.933	--	--	-1.77
		4	39.19	73.74	Muji Glacier	0	-0.353456				1963	-0.067	--	--	--	--	--	--	--	--	--	--	1.3284	--	--	-1.33
		5	41.75	79.9	Qingbingtan No. 72	-0.198	-0.383628				1964	-0.065	--	--	--	--	--	--	--	--	0.4466	-0.13077	0.3981	--	--	-0.81
		6	47.06	85.56	Muz Taw Glacier	0	-0.8005				1965	0.309	--	--	--	--	--	--	--	--	0.7249	-0.242	1.7489	--	--	-0.83
		7	43.05	77.08	Ts． Tuyuksuyskiy	-0.392093	-0.447182				1966	-0.065	--	--	--	--	--	--	--	--	0.7443	-0.29736	2.2122	--	--	-0.77
		8	42.46	74.495	Golubin	-0.302846	-0.172091				1967	-0.135	--	--	--	--	--	--	--	--	0.7508	-0.20711	1.2711	--	--	-0.54
		9	39.62	71.56	Abramov	-0.46424	-0.264471				1968	-0.591	--	--	--	--	--	--	--	--	1.2621	-0.16281	2.1055	--	--	-1.32	0.317
					Average	-0.186101	-0.376505				1969	-0.443	--	--	--	--	--	--	--	--	1.3592	-0.23959	0.6704	--	--	-1.11	0.107
	transition between westerlies-dominated and monsoon-dominated	10	39.24	97.76	Qiyi	-0.01824	-0.437688				1970	-0.756	--	--	--	--	--	--	--	--	1.9482	-0.1708	-0.0118	--	--	-0.99	-0.559
		11	38.21	99.88	Shiyi	-0.010428	-0.581083				1971	-0.654	--	--	--	--	--	--	--	--	1.8252	-0.05582	0.5309	--	--	-1.32	-0.123
		12	39.43	96.55	Laohugou NO.12	-0.024863	-0.37928				1972	-0.392	--	--	--	--	--	--	--	--	1.1974	0.01083	0.2423	--	--	-1.19	-1.076
		13	35.6	94.18	Meikuang	-0.036853	-0.121234				1973	-1.1	--	--	--	--	--	--	--	--	0.6861	0.0558	-0.2259	--	--	-1.49	-1.389
		14	33.06	92.08	Xiao Dongkzmadi	-0.26284	-0.408271				1974	-1.225	--	--	--	--	--	--	--	--	0.6796	0.09845	0.542	-0.2187	--	-2.11	-2.6
		15	30.45	81.33	Naimona'nyi	-0.333169	-0.704022				1975	-0.937	--	--	--	-0.17256	-0.09385	0.035	-0.01225	0.14458	0.2977	-0.0333	0.4674	0.2685	--	-2.56	-3.432
		16	33.08	89.17	Purogangri Ice Cap	-0.21	-0.531				1976	-0.908	--	--	--	-0.33359	-0.07733	0.419	-0.54061	0.25525	0.7184	0.08718	1.3031	0.0805	--	-3.28	-4.744
					Average	-0.128056	-0.451797				1977	-0.728	--	--	--	-0.4651	-0.14141	0.769	-0.73269	0.17268	1.5534	0.05994	0.7232	-0.0972	--	-4.38	-5.941
	monsoon-dominated glaciers	17	28.45	85.75	Kangwure	-0.412125	-0.589545				1978	-0.838	--	--	--	-0.64307	-0.28127	0.768	-1.108	0.22175	1.7023	0.04979	2.9974	-0.3056	--	-5.86	-6.438
		18	30.18	90.47	Gurenhekou	0	-0.312				1979	-0.922	--	--	--	-0.95765	-0.62604	1.009	-1.7775	0.21973	1.411	0.30886	1.0695	-0.2174	--	-6.38	-7.411
		19	29.58	101.93	Hailuogou	-0.214674	-0.279124				1980	-1.257	-0.12756	--	--	-1.20222	0.08866	1.139	-2.33807	0.20378	0.9515	0.35228	1.4676	-0.2212	--	-7.01	-7.333
		20	27.12	100.204	Baishui River No. 1	-0.19734	-1.00618				1981	-1.909	-0.06023	--	--	-1.29556	0.10976	1.088	-2.19165	0.33796	-0.5954	0.17765	0.8321	-0.0204	--	-6.9	-8.021
		21	29.38	96.97	Parlung NO. 94	0.013634	-0.570163				1982	-1.954	0.32859	--	--	-1.43728	0.08906	1.285	-2.67185	0.28234	-0.2782	0.40071	-0.747	-0.5869	--	-7.53	-8.365
					Average	-0.162101	-0.551402				1983	-1.854	0.41591	--	--	-1.74289	-0.44294	1.577	-3.10753	0.20829	0.3367	0.43726	-2.6181	-0.2838	--	-8.07	-9.109
											1984	-1.937	0.42461	--	--	-2.00037	-0.11714	1.803	-3.40156	0.34989	1.5988	0.29698	-2.5227	-0.5741	--	-9.32	-9.796
											1985	-2.549	0.48137	--	--	-2.19303	0.27616	1.772	-3.89369	0.29189	1.6571	0.36045	-1.9103	-0.9462	--	-9.87	-10.657
											1986	-3.218	0.39128	--	--	-2.34465	0.12636	1.607	-4.39601	0.50743	2.4791	0.5598	-3.1517	-0.9296	--	-10.39	-10.376
											1987	-3.394	0.41039	--	--	-2.50969	0.66876	1.645	-5.0428	0.47963	2.9257	0.7084	-3.4042	-1.7621	--	-10.73	-10.328
											1988	-4.036	0.33808	--	--	-2.62978	1.30616	1.596	-5.311	0.26954	3.2299	0.69469	-5.0497	-2.1138	--	-11.34	-10.484
											1989	-3.93	0.27071	--	--	-2.70118	1.41536	1.391	-4.786	0.54354	3.7283	0.59869	-5.4479	-2.8133	--	-11.8	-10.871
											1990	-3.878	0.21119	--	--	-2.81618	1.72046	1.574	-4.741	0.45354	3.8124	0.59979	-3.8797	-3.1854	--	-12.76	-11.224
											1991	-4.584	0.33983	--	--	-2.97118	1.46176	1.169	-4.921	0.15354	3.0033	0.46525	-4.1315	-3.7928	--	-13.86	-10.802
											1992	-4.561	0.20199	--	--	-3.11618	0.77306	1.301	-4.546	0.27354	3.0486	0.48116	-4.3719	-4.4411	-0.25	-14.1	-10.353
											1993	-4.59	0.51877	--	--	-3.7476	-0.13254	1.742	-4.336	0.37354	2.8738	0.45598	-4.7807	-5.3657	-0.89	-13.498	-10.966
											1994	-4.968	0.49066	--	--	-3.95766	-0.78224	1.457	-4.846	-0.02646	2.9191	0.19821	-5.6613	-5.6151	-1.374	-13.941	-11.846
											1995	-5.196	0.51207	--	--	-4.13877	-0.77004	1.184	-5.416	-0.48246	2.4466	0.25571	-6.081	-6.335	-1.834	-14.528	-12.296
											1996	-5.154	0.64799	--	--	-4.45615	-0.03424	0.569	-5.911	-0.36142	1.2233	0.36666	-6.523	-6.7378	-2.142	-14.984	-14.126
											1997	-6.007	0.55156	--	--	-4.69067	0.11136	0.276	-5.566	-0.35142	0.4013	0.13108	-6.6952	-7.468	-2.393	-16.451	-14.026
											1998	-6.797	0.56955	--	--	-4.99687	0.06146	0.322	-6.256	-0.77142	-0.0324	0.05564	-8.5189	-8.1777	-2.9	-16.81	-14.8557
											1999	-7.588	0.55488	--	--	-5.36685	0.34086	-0.456	-6.571	-0.92133	-0.3754	-0.03177	-9.275	-8.6624	-3.297	-17.04	-15.6149
											2000	-7.918	0.39357	-0.29	--	-5.64025	0.53716	-1.068	-6.661	-1.11329	-1.3916	-0.28149	-8.9973	-9.2698	-3.526	-17.153	-14.7922
											2001	-8.758	0.00734	-0.76	--	-5.85428	0.68566	-1.734	-6.856	-1.33749	-2.6537	-0.57957	-8.6071	-10.4399	-4.211	-17.708	-14.3585
											2002	-9.592	-0.01242	-1.09	--	-5.98316	1.26906	-2.544	-7.439	-1.51115	-3.644	-0.96965	-7.6886	-11.0575	-4.707	-18.01	-14.1902
											2003	-9.976	-0.07031	-0.88	--	-6.34418	0.94906	-2.905	-7.435	-1.63094	-4.3107	-1.44201	-9.4441	-11.6956	-5.281	-17.651	-14.296
											2004	-10.731	0.04813	-1.36	--	-6.49348	0.57136	-3.539	-7.588	-1.92091	-4.7444	-1.96758	-10.6152	-11.904	-5.76	-17.589	-14.8175
											2005	-11.219	0.07439	-1.65	--	-6.67633	-0.03974	-4.015	-7.765	-1.81104	-4.2978	-2.40091	-11.3029	-12.6342	-6.488	-17.929	-15.4805
											2006	-11.993	0.07366	-2.11	--	-7.08333	-0.97774	-4.97	-8.682	-2.05358	-4.9904	-2.53107	-11.6197	-13.5178	-7.511	-18.898	-17.3368
											2007	-12.635	0.07329	-2.47275	--	-7.48199	-1.05974	-5.483	-9.273	-2.01667	-5.683	-2.76292	-12.6892	-14.1252	-7.903	-19.813	-16.5861
											2008	-13.566	0.04784	-3.19994	--	-7.83717	-2.06374	-5.588	-9.353	-1.9836	-6.1684	-3.21526	-13.7248	-14.9986	-8.39	-21.17	-16.2244
											2009	-13.503	-0.01632	-2.88771	--	-7.98861	-3.99374	-5.662	-9.444	-1.97606	-5.7736	-3.8396	-14.7602		-9.482	-20.964	-17.3388
											2010	-14.83	-0.0289	-3.62927	--	-8.35881	-4.64074	-6.31	-10.51	-2.21917	-5.4564	-4.35714	-16.2112		-9.782	-20.932	-17.596
											2011	-15.775	0.01691	-4.30927	--	-8.679	-4.48574	-6.33578	-11.1227	-2.23305	-6.8868	-4.6903	-17.134			-21.246	-18.017
											2012	-16.488	0.00433	-4.93226	--	-9.00005	-5.96374	-6.43185	-11.7045	-2.34414	-7.5276	-5.19546	-18.8431			-22.269	-18.344
											2013	-17.024	0.03201	-5.29664	-0.04378	-9.27459	-7.01274	-6.58363	-12.2868	-2.6186	-8.6991	-5.59135	-20.7206			-22.609	-19.094
											2014	-17.209	0.06435	-5.52702	-0.49309		-8.12874				-8.9515	-5.95564	-22.3058			-23.697	-18.924
											2015	-17.849	0.03525	-6.0553	-1.01613		-8.78174				-9.0874	-6.13313	-23.7897			-24.453	-18.544
											2016	-18.847	0.07617		-1.25346						-10.3495	-6.50441	-25.6667			-23.892	-18.898
											2017	-19.528	0.07494		-1.76728						-10.8349	-6.97982	-27.3862			-25.005	-18.842
											2018	-20.24	0.02933									-7.03813				-25.08	-19.502
											2019	-20.512														-25.66	-19.378
											2020	-21.18														-26.269	-20.674
											2021	-21.983														-26.878

## Sheet: Table S8
	Table S8. Summary of available meteorological and ablation observations at each glacier, as well as model types, each glacier’s model period. Variables were reconstructed based on other variables measured at the same station. Study period and geographical information of the glaciers and automatic weather station (AWS). Incoming shortwave radiation (SWin), Outcoming shortwave radiation (SWout), In…
	Classification	Name	RGI-Id	AWS Elevation (m a.s.l.)	Debris thickness (cm)	AWS variables measured	Observed period	Model types	Distributed or point	Model period	References
	Westerlies dominated glacier	Urumqi Glacier No.1 (UG1)	West branch: RGI60-13.45334; East branch: RGI60-13.45335	4025 (ablation area)		SWin, T, P, Ps, RH, WS	September 1, 2018 - August 31, 2021/ 2011-2017 mass balance year	COupled Snowpack and Ice surface energy and Mass balance model/ Surface energy and mass balance model without considering the refreezing process of meltwater	Point/ distributed	September 1, 2018 - August 31, 2021/ 2011-2017 mass balance year	This study; Li et al., 2022; Che et al., 2019
		Fan-shaped Diffluence (SF)		3518 (ablation area)		SWin, T, P, Ps, RH, WS	Jul 16-Aug 4, 2021	COupled Snowpack and Ice surface energy and Mass balance model	point	September 1, 2018 - August 31, 2021	This study
			RGI60-13.48187; RGI60-13.48181
		Muz Taw (MT)	RGI60-10.00604	3430 (ablation area)		SWin, T, P, Ps, RH, WS	Aug 27, 2019 - Aug 31, 2021	COupled Snowpack and Ice surface energy and Mass balance model	point	September 1, 2018 - August 31, 2021	This study
		Muji	RGI60-13.42413	4685		SWin, T, P, Ps, RH, WS	July 2011 – July 2017	Surface energy balance model that considers meltwater refreezing	distributed	July 2011 – July 2017	Zhu et al., 2020
		(MJ)
		Muztag Ata No. 15	RGI60-13.41401	AWS1		SWin, T, P, Ps, RH, WS	November 2009- September 2012	Surface energy balance model that considers meltwater refreezing	distributed	1980-2012	Zhu et al., 2018
		Guliya ice cap (GIC)	RGI60-13.53249	AWS1 and AWS2		SWin, T, P, Ps, RH, WS	2015-2016	Surface energy balance model that considers meltwater refreezing	distributed	2015-2016	Li et al., 2019
		Keqicar	RGI60-13.43232	4200 (ablation area)		SWin, SWout, LWin, LWout, Ps, WS, T, RH	June-September 2005	Sensible heat and latent heat are calculated by the aerodynamic-gradient method, and the net radiation is obtained by observation	point	June-September 2005	Li jing et al.,2007
		(KQC)
		Abramov	RGI60-13.18096	3837 (ablation area)		T, P, cloud cover, RH, Ps	October 1986- October 1999; October 2012- October 2020	Coupled surface energy balance–multilayer subsurface	point	1968-2020	Kronenberg et al., 2022
		(ABR)						model
		Qingbingtan Glacier No. 72	RGI60-13.43165	3950 (ablation area)	13	SWin, LWin, T, P, Ps, RH, WS	July 30-August 29, 2008	Debris energy balance model	point	July 30-August 29, 2008	This study
		(QBT)
	Transition between westerlies and monsoon dominated glaciers	Xiao Anglong	RGI60-14.25559	AWS1 and AWS2		SWin, T, P, Ps, RH, WS	October 2014 - October 2019	Surface energy balance model that considers meltwater refreezing	distributed	1968-2019	Zhu et al., 2021
		(XA)
		Laohugou glacier No. 12	RGI50-13.33006	4550 (ablation area)		SWin,SWout, P,RH/ SWin, T, P, Ps, RH, WS	June–September 2012/ September 2020 to August 2021	Surface energy and mass balance model without considering the refreezing process of meltwater/ COupled Snowpack and Ice surface energy and Mass balance model	Point/ distributed	June–September 2012/ September 2020 to August 2021	Chen et al., 2014, 2023
		(LHG)
		Qiangtang No.1	RGI50-13.49367	5882 (ablation area)		SWin, T, P, Ps, RH, WS	November 2012-November 2016	Surface energy balance model that considers meltwater refreezing	point	November 2012-November 2016	Li et al., 2017
		(QT)
		Naimona'nyi Glacier	RGI60-15.09026; RGI60-15.13117	5543		SWin, T, P, Ps, RH, WS	October 2010 - October 2018	Surface energy balance model that considers meltwater refreezing	distributed	October 2010 - October 2018	Zhu et al., 2021
		(NN)
		Qiyi	RGI60-13.32330	Tuole		SWin, T, P, Ps, RH, WS	October 1969 - September 2015	Surface energy balance model that considers meltwater refreezing	distributed	October 1969 - September 2015	Zhu et al., 2022
		(QY)
		Ningchan No.1	RGI60-13.31356	Menyuan		SWin, T, P, Ps, RH, WS	October 1969 - September 2015	Surface energy balance model that considers meltwater refreezing	distributed	October 1969 - September 2015	Zhu et al., 2022
		(NC)
		Bailanghe No. 21 glacier	RGI60-13.31703	4290		SWin, T, P, Ps, RH, WS	September 2020 - August 2021	COupled Snowpack and Ice surface energy and Mass balance model	distributed	September 2020 - August 2021	Chen et al., 2023
		(BLH)
		Xiao dongkemadi	RGI60-13.24556	5600		SWin,SWout, P,RH	1992–1993	Surface energy and mass balance model without considering the refreezing process of meltwater	distributed	1992–1993	Liang et al., 2019
		(DKMD)
		Bayi ice cap	RGI60-13.31623	4800 (ablation area)		SWin,SWout, P,RH	June–September 2016	Surface energy and mass balance model without considering the refreezing process of meltwater	point	June–September 2016	Qiang et al., 2018
		(BY)
		Sutri Dhaka	RGI60-14.16041	4864		SWin, T, P, Ps, RH, WS	October 2015 to September 2017	COupled Snowpack and Ice surface energy and Mass balance model	distributed	October 2015 to September 2017	Oulkar et al., 2022
		(SUD)
		Chhota Shigri	RGI60-14.15990	4670 (ablation area)		SWin, SWout, LWin, LWout, Ps, WS, T, RH	October 2012 to September 2013	Surface energy balance calculation	point	October 2012 to September 2013	Azam et al., 2014
		(CHS)
		Purogangri ice cap (PIC)	RGI60-13.49305-RGI60-13.49314; RGI60-13.53878- RGI60-13.53900; RGI60-13.53905- RGI60-13.53906; RGI60-13.54195- RGI60-13.54213	High Asia Refined analysis (HAR)		SWin, T, P, Ps, RH, WS	2000-2011	COupled Snowpack and Ice surface energy and Mass balance model	distributed	2000-2011	Huintjes et al., 2015a
	Monsoon dominated glaciers	Parlung No. 4	RGI60-15.11973	4800 (ablation area)		SWin, T, P, Ps, RH, WS	June–September 2016	Surface energy balance model that considers meltwater refreezing	point	June–September 2016	Yang et al., 2017
		(PL04)
		Parlung No. 94	RGI60-15.11693	4600		SWin, T, P, Ps, RH, WS	October 2005 - October 2010	Surface energy balance model that considers meltwater refreezing	distributed	October 2005 - October 2010	Yang et al., 2013
		(PL94)
		Zhadang	RGI60-13.49754	5665		SWin, T, P, Ps, RH, WS	2009-2012	COupled Snowpack and Ice surface energy and Mass balance model	distributed	October 2001–September 2011	Huintjes et al., 2015b
		(ZD)
		Yala	RGI60-15.03954	5340 (ablation area)		SWin, SWout, LWin, LWout, WS, T, P, RH	May 1 - October 31, 2019	Tethys–Chloris energy-balance model	point	May 1 - October 31, 2019	ICIMOD RDS database (2021)
		(YAL)
		24 K	RGI60-15.11758	3900 (ablation area)	25	SWin, LWin, T, P, Ps, RH, WS	June–September 2016	Debris energy balance model	point	June–September 2016	Yang et al., 2017
		Lirung	RGI60-15.04045	4076 (ablation area)	30	SWin, SWout, LWin, LWout, WS, T, P, RH	May 5 - October 24, 2014	Tethys–Chloris energy-balance model	point	May 5 - October 24, 2014	Ragettli et al.2015
		(LIR)
		Langtang	RGI60-15.04121	4536 (ablation area)	50	SWin, SWout, LWin, LWout, WS, T, P, RH	May 11-October 30, 2019	Tethys–Chloris energy-balance model	point	May 11-October 30, 2019	Fugger et al., 2022
		(LAN)
		Changri Nup	RGI60-15.03734	5470 (ablation area)	10	SWin, SWout, LWin, LWout, WS, T, P, RH	May 1 - October 31, 2016	Tethys–Chloris energy-balance model	point	May 1 - October 31, 2016	Wagnon (2021)
		(CNU)
		Hailuogou	RGI60-15.07886	3550 (ablation area)	1	SWin, SWout, LWin, LWout, WS, T, P, RH	May 15 - October 31, 2018	Tethys–Chloris energy-balance model	Point	May 15 - October 31, 2018	Zhang et al., (2011)
		(HAI)

## Sheet: Table S9
Table S9 Cumulative mass balance of 30 glaciers distributed in High Mountain Asia from 2000 to 2021 based on OGGM
Year	Urumqi Glacier No.1	Fan-shaped	Muz Taw	Muji	Muztag Ata No. 15	Guliya ice cap	Keqicar	Abramov	Qingbingtan Glacier No.72	Xiao Anglong	Laohugou glacier No.12	Qaingtang No.1	Naimona'nyi Glacier	Qiyi	Ningchanhe No.1	Bailanghe No.21	Xiaodongkemadi	Bayi ice	Purogangri ice cap	Palung No.4	Palung No.94	Zhadang	Sutri Dhaka	Chhota Shigri	Yala	24K	Lirung	Langtang	Changri Nup	Hailuogou
2000	-1.08706	-1.11625	-0.59303	-0.20033	0.63007	0.11726	-0.35789	0.13416	0.10616	-0.23877	-0.81913	-0.29081	-0.67187	-0.53631	-1.08117	-1.01636	-1.16324	-0.96886	-0.0574	-0.91957	-2.39758	-1.55156	-1.66846	-0.9872	-1.51518	-0.43958	-3.35615	-1.4162	-1.37677	-1.81025
2001	-1.65356	-1.64173	-1.08026	-0.41905	0.9352	0.1697	-0.46852	0.06368	0.23341	-0.34551	-1.19882	-0.43065	-1.1522	-0.80713	-1.54263	-1.59024	-1.61993	-1.45031	-0.06656	-1.69296	-3.51545	-2.03115	-2.6473	-1.49423	-2.08014	-0.66058	-4.71656	-1.97184	-2.00096	-2.3535
2002	-2.30858	-2.18101	-1.43207	-0.43619	1.27844	0.21177	-0.55876	0.27667	0.3377	-0.48189	-1.50536	-0.57823	-1.58082	-1.10384	-2.04037	-2.17876	-2.23242	-1.97492	-0.06196	-1.69073	-4.26529	-2.52859	-3.09435	-1.65314	-2.42078	-0.75128	-6.06534	-2.42622	-2.51485	-2.87436
2003	-2.75202	-2.53677	-1.93147	-0.26407	1.5902	0.25743	-0.62321	0.49722	0.47982	-0.63358	-1.32122	-0.59984	-1.8293	-1.05259	-2.38932	-2.34467	-2.87056	-2.21626	-0.0338	-2.12422	-5.31986	-3.21149	-3.63436	-1.90828	-2.93574	-0.82748	-7.26995	-2.91741	-3.08356	-3.59938
2004	-3.23867	-3.01826	-2.62659	0.16868	2.10471	0.33372	-0.68869	0.59917	0.60318	-0.75134	-1.3039	-0.6351	-2.26755	-1.09046	-2.62183	-2.59386	-3.35669	-2.43461	0.02873	-2.10448	-6.29779	-3.6012	-4.09292	-2.13017	-3.39513	-1.05869	-8.88551	-3.50183	-3.67242	-4.06748
2005	-3.8156	-3.57423	-3.58991	0.46362	2.57108	0.37904	-0.79754	0.86998	0.74079	-0.87872	-1.39573	-0.83212	-2.53748	-1.29085	-3.1559	-3.08493	-3.98951	-2.89115	-0.00557	-3.1871	-7.48178	-4.41667	-4.28394	-2.20209	-4.03977	-1.26791	-10.1094	-4.02413	-4.17481	-4.71229
2006	-4.48881	-4.14865	-4.9415	0.32919	2.83752	0.42498	-1.04043	0.98625	0.62107	-0.97618	-1.82908	-1.17723	-2.92873	-1.80022	-3.69846	-3.71597	-4.83263	-3.44684	-0.1407	-4.6664	-8.69883	-5.42977	-5.02769	-2.57131	-4.6732	-1.53906	-11.5219	-4.64155	-4.75162	-5.50894
2007	-5.10595	-4.73671	-5.44407	0.17249	3.18282	0.48529	-1.36366	0.93386	0.54131	-1.1142	-1.92333	-1.35467	-3.45091	-1.95375	-4.29972	-4.14298	-5.38881	-3.8168	-0.1297	-5.29877	-9.76908	-6.13546	-6.15435	-3.11833	-5.23902	-1.84623	-12.874	-5.22442	-5.3652	-6.02491
2008	-5.83744	-5.44215	-6.73218	-0.23592	3.48682	0.55221	-1.67143	0.8989	0.38367	-1.17979	-1.93228	-1.3113	-3.84116	-2.03829	-4.87048	-4.42961	-5.72861	-4.13848	0.02149	-6.10629	-11.1138	-6.59486	-7.04117	-3.47962	-5.97553	-2.09951	-14.365	-5.88702	-6.10121	-6.47066
2009	-6.25384	-5.85065	-7.21677	0.114	3.94741	0.61557	-1.71476	1.19347	0.53574	-1.34077	-2.01802	-1.53849	-4.21289	-2.14497	-5.48725	-4.82035	-6.44438	-4.54545	-0.01907	-7.80003	-12.5569	-7.71101	-7.14367	-3.41357	-6.78966	-2.39191	-15.9859	-6.55359	-6.85387	-7.37964
2010	-6.99566	-6.45022	-8.41178	0.54968	4.50825	0.64173	-1.87347	1.69055	0.68943	-1.49656	-2.64206	-2.06123	-4.5935	-2.67893	-6.11642	-5.67256	-7.43991	-5.17753	-0.20822	-7.74719	-13.3104	-9.12533	-6.91434	-3.2981	-7.52172	-2.63239	-17.6233	-7.20288	-7.44851	-8.32226
2011	-7.68644	-7.05632	-9.66974	0.21075	4.62964	0.69415	-2.04101	1.80773	0.7563	-1.63341	-2.89001	-2.16053	-4.95014	-2.95212	-6.54316	-6.20053	-7.85054	-5.65736	-0.15891	-7.51453	-14.1213	-9.83906	-7.32203	-3.5745	-8.14498	-2.71442	-19.0371	-7.80019	-8.01735	-8.87807
2012	-8.29422	-7.66023	-10.6748	0.58452	5.16898	0.73847	-2.17526	2.0006	0.86117	-1.83149	-2.99571	-2.45476	-5.51569	-3.19177	-6.98093	-6.75228	-8.7497	-6.14537	-0.2503	-7.28463	-14.7627	-11.3058	-7.75952	-3.83054	-8.85712	-2.72929	-20.3585	-8.36091	-8.57896	-9.36435
2013	-8.80641	-8.13313	-11.2525	0.1434	5.28662	0.75578	-2.33575	2.20836	0.9079	-1.99435	-3.16247	-2.96684	-5.92609	-3.54435	-7.54927	-7.30323	-9.5257	-6.66028	-0.50672	-8.01327	-15.8042	-12.1184	-8.01379	-4.00215	-9.54284	-2.90161	-21.7325	-8.94457	-9.14256	-10.1109
2014	-9.13424	-8.56291	-12.2068	0.20083	5.64822	0.81707	-2.38373	2.52911	1.10871	-2.14485	-3.27007	-3.26918	-6.38277	-3.59628	-7.95929	-7.51676	-10.0564	-6.86797	-0.52527	-8.54336	-16.8516	-13.1015	-8.23082	-4.11007	-10.1723	-3.06591	-23.1101	-9.47289	-9.61639	-10.7149
2015	-9.63275	-9.03622	-12.902	0.000552785	5.94065	0.88179	-2.50741	2.98081	1.17564	-2.26307	-3.28503	-3.63124	-6.59902	-3.53626	-8.31659	-7.63408	-10.7875	-6.96864	-0.56684	-8.65977	-17.8776	-14.2426	-8.13216	-4.0494	-10.6316	-3.24572	-24.1872	-9.88825	-9.94812	-11.1051
2016	-10.5144	-9.681	-13.877	-0.33364	6.27658	0.89157	-2.71521	3.03632	1.17603	-2.46916	-4.0156	-3.96166	-7.41117	-4.19393	-8.83316	-8.48225	-11.3587	-7.63022	-0.71874	-9.22153	-18.8961	-15.1237	-9.1739	-4.64319	-11.5404	-3.53833	-25.7874	-10.6241	-10.6038	-11.521
2017	-11.1624	-10.2544	-15.069	-0.000437182	6.80279	0.92898	-2.78649	3.34776	1.34697	-2.58676	-4.25034	-4.19662	-8.00329	-4.47724	-9.34664	-9.03069	-12.0374	-8.06424	-0.78418	-9.93443	-19.947	-16.2205	-9.74947	-4.95233	-12.2781	-3.77896	-27.4662	-11.2988	-11.2787	-11.9261
2018	-11.8195	-10.7774	-16.355	-0.31368	6.97871	0.94005	-2.96109	3.57424	1.34301	-2.77581	-4.65092	-4.7936	-8.82723	-5.06917	-10.0817	-9.90977	-12.8662	-8.74912	-1.05329	-11.9022	-21.5597	-17.4497	-10.3305	-5.26409	-13.1412	-4.16465	-29.1338	-12.0512	-11.9313	-12.132
2019	-12.4163	-11.3551	-16.665	-0.52379	7.34926	0.98688	-3.09563	3.96063	1.38205	-2.8699	-4.66106	-5.12296	-9.30921	-5.2143	-10.6664	-10.3546	-13.4259	-9.20235	-1.03685	-12.8547	-22.776	-18.6308	-10.3854	-5.33474	-13.7573	-4.35372	-30.4419	-12.5669	-12.4657	-12.3768
2020	-12.8464	-12.0704	-17.325	-0.72386	7.65532	1.0053	-3.22423	4.07557	1.46154	-3.07896	-4.71361	-5.73321	-9.96397	-5.33078	-11.2442	-10.7922	-14.4573	-9.49261	-1.34487	-13.7026	-24.2901	-19.9909	-11.6145	-5.8779	-14.7231	-4.55499	-32.0095	-13.3982	-13.0418	-13.1014
2021	-13.5358	-12.9237	-17.699	-0.87841	7.97295	1.04297	-3.50808	4.32239	1.19307	-3.28282	-5.08314	-6.19077	-10.4196	-5.67126	-11.8682	-11.4278	-15.6505	-9.9591	-1.58871	-14.7985	-26.2058	-21.1257	-12.675	-6.42746	-15.7647	-4.80848	-33.8235	-14.3714	-13.7258	-13.9812

## Sheet: Table S10
		SSP 1-2.6							SSP 2-4.5							SSP 5-8.5
	year	Westerlies-dominated glaciers volume	Transition between westerlies-dominated and monsoon-dominated glaciers volume	Monsoon-dominated glaciers volume	Sum volume	Standardization volume		year	Westerlies-dominated glaciers volume	Transition between westerlies-dominated and monsoon-dominated glaciers volume	Monsoon-dominated glaciers volume	Sum volume	Standardization volume		year	Westerlies-dominated glaciers volume	Transition between westerlies-dominated and monsoon-dominated glaciers volume	Monsoon-dominated glaciers volume	Sum volume	Standardization volume
	2020	2.35371e+09	3.61292e+09	8.81705e+08	6.84834e+09	1		2020	2.35371e+09	3.65729e+09	8.81425e+08	6.89243e+09	1.00644		2020	2.26255e+09	4.45852e+09	8.81523e+08	7.60259e+09	1.11014
	2021	2.33775e+09	3.59195e+09	8.69082e+08	6.79878e+09	0.992763		2021	2.33863e+09	3.6368e+09	8.69134e+08	6.84456e+09	0.999448		2021	2.24832e+09	4.43152e+09	8.68847e+08	7.54869e+09	1.10227
	2022	2.32151e+09	3.56867e+09	8.56998e+08	6.74718e+09	0.985229		2022	2.32244e+09	3.61419e+09	8.56661e+08	6.79329e+09	0.991962		2022	2.23233e+09	4.40314e+09	8.55881e+08	7.49135e+09	1.09389
	2023	2.30509e+09	3.54732e+09	8.44945e+08	6.69736e+09	0.977953		2023	2.30479e+09	3.59446e+09	8.44772e+08	6.74401e+09	0.984766		2023	2.21596e+09	4.37126e+09	8.4322e+08	7.43044e+09	1.085
	2024	2.2863e+09	3.52692e+09	832664232	6.64589e+09	0.970438		2024	2.28718e+09	3.57191e+09	8.32108e+08	6.6912e+09	0.977054		2024	2.20104e+09	4.34153e+09	8.31245e+08	7.37382e+09	1.07673
	2025	2.26909e+09	3.50772e+09	8.20038e+08	6.59684e+09	0.963276		2025	2.26944e+09	3.54893e+09	8.20571e+08	6.63894e+09	0.969424		2025	2.18467e+09	4.31117e+09	8.18187e+08	7.31403e+09	1.068
	2026	2.25277e+09	3.48814e+09	8.07623e+08	6.54853e+09	0.956222		2026	2.25237e+09	3.52945e+09	8.08988e+08	6.59081e+09	0.962395		2026	2.16793e+09	4.28464e+09	8.05751e+08	7.25833e+09	1.05987
	2027	2.23743e+09	3.46718e+09	7.95395e+08	6.5e+09	0.949135		2027	2.23622e+09	3.50714e+09	7.97167e+08	6.54053e+09	0.955053		2027	2.15131e+09	4.25619e+09	7.93699e+08	7.20119e+09	1.05152
	2028	2.22049e+09	3.44531e+09	7.82287e+08	6.44808e+09	0.941554		2028	2219091671	3.48698e+09	7.85461e+08	6.49153e+09	0.947898		2028	2.13526e+09	4.22413e+09	7.81226e+08	7.14062e+09	1.04268
	2029	2.20397e+09	3.42172e+09	7.7018e+08	6.39587e+09	0.93393		2029	2.20306e+09	3.46307e+09	7.73471e+08	6.4396e+09	0.940316		2029	2.12031e+09	4.19528e+09	7.69717e+08	7.08531e+09	1.0346
	2030	2.18695e+09	3.39953e+09	7.57822e+08	6.3443e+09	0.926399		2030	2.18704e+09	3.43722e+09	7.60652e+08	6.38492e+09	0.932331		2030	2.1026e+09	4.16325e+09	7.57553e+08	7.02341e+09	1.02556
	2031	2.16947e+09	3.37905e+09	7.46301e+08	6.29481e+09	0.919174		2031	2.17039e+09	3.41223e+09	7.49139e+08	6.33176e+09	0.924568		2031	2.08627e+09	4.13349e+09	7.45941e+08	6.9657e+09	1.01714
	2032	2.15101e+09	3.35909e+09	7.34736e+08	6.24484e+09	0.911877		2032	2.15319e+09	3.38788e+09	7.38004e+08	6.27908e+09	0.916876		2032	2.0709e+09	4.10343e+09	7.3413e+08	6.90847e+09	1.00878
	2033	2.13574e+09	3.33532e+09	7.2336e+08	6.19442e+09	0.904514		2033	2134875044	3.36383e+09	7.26631e+08	6.22534e+09	0.909029		2033	2.05511e+09	4.06714e+09	7.22137e+08	6.84438e+09	0.999422
	2034	2.11986e+09	3.3121e+09	7.12605e+08	6.14457e+09	0.897234		2034	2.11779e+09	3.33951e+09	7.15243e+08	6.17255e+09	0.90132		2034	2.03739e+09	4.03346e+09	7.09978e+08	6.78083e+09	0.990142
	2035	2.10256e+09	3.28633e+09	7.02055e+08	6.09095e+09	0.889405		2035	2.10053e+09	3.31366e+09	7.04187e+08	6.11838e+09	0.893411		2035	2.01938e+09	4.0004e+09	6.98632e+08	6.71842e+09	0.981029
	2036	2.08371e+09	3.26209e+09	6.91568e+08	6.03736e+09	0.881581		2036	2.08344e+09	3.28925e+09	6.93722e+08	6.06641e+09	0.885822		2036	2.00155e+09	3.96741e+09	6.87903e+08	6.65686e+09	0.97204
	2037	2.06756e+09	3.23691e+09	6.81127e+08	5.9856e+09	0.874022		2037	2.06616e+09	3.26358e+09	6.83152e+08	6.01289e+09	0.878008		2037	1.98267e+09	3.92943e+09	6.76018e+08	6.58812e+09	0.962002
	2038	2.05081e+09	3.2119e+09	6.69908e+08	5.93262e+09	0.866286		2038	2.04868e+09	3.24051e+09	6.71577e+08	5.96077e+09	0.870396		2038	1.96503e+09	3.89083e+09	6.65107e+08	6.52097e+09	0.952197
	2039	2.03387e+09	3.18788e+09	6.59809e+08	5.88156e+09	0.85883		2039	2.0333e+09	3.21599e+09	6.60989e+08	5.91027e+09	0.863023		2039	1.9474e+09	3.85401e+09	6.54137e+08	6.45555e+09	0.942645
	2040	2.01452e+09	3.1614e+09	6.49442e+08	5.82536e+09	0.850624		2040	2.01477e+09	3.18924e+09	6.50686e+08	5.8547e+09	0.854908		2040	1.92864e+09	3.81745e+09	6.43291e+08	6.38937e+09	0.932981
	2041	1.99642e+09	3.13236e+09	6.39128e+08	5.76791e+09	0.842235		2041	1.99653e+09	3.1639e+09	6.40007e+08	5.80044e+09	0.846984		2041	1.91058e+09	3.78103e+09	6.32532e+08	6.32414e+09	0.923456
	2042	1.97924e+09	3.1064e+09	6.29293e+08	5.71493e+09	0.834499		2042	1.97662e+09	3.13793e+09	6.29289e+08	5.74385e+09	0.838721		2042	1.89136e+09	3.74657e+09	6.21614e+08	6.25955e+09	0.914024
	2043	1.96071e+09	3.07725e+09	6.19278e+08	5.65724e+09	0.826074		2043	1.95738e+09	3.11373e+09	618837289	5.68994e+09	0.83085		2043	1.87257e+09	3.70823e+09	6.11214e+08	6.19202e+09	0.904164
	2044	1.94322e+09	3.0509e+09	609631184	5.60375e+09	0.818264		2044	1.93843e+09	3.08634e+09	6.08692e+08	5.63346e+09	0.822602		2044	1.85291e+09	3.66619e+09	6.00835e+08	6.11993e+09	0.893637
	2045	1.92641e+09	3.02486e+09	6.00704e+08	5.55198e+09	0.810704		2045	1.92002e+09	3.05813e+09	5.98976e+08	5.57713e+09	0.814376		2045	1.83339e+09	3.62401e+09	5.90032e+08	6.04743e+09	0.883051
	2046	1.90723e+09	3.00197e+09	5.90843e+08	5.50004e+09	0.803121		2046	1.8989e+09	3.03365e+09	5.88235e+08	5.52078e+09	0.806149		2046	1.81365e+09	3.58302e+09	5.79343e+08	5.97602e+09	0.872622
	2047	1.88858e+09	2.97469e+09	5.81795e+08	5.44506e+09	0.795092		2047	1.88299e+09	3.00586e+09	5.77633e+08	5.46648e+09	0.79822		2047	1.79352e+09	3.5417e+09	5.68774e+08	5.90399e+09	0.862105
	2048	1.87001e+09	2.94665e+09	5.72305e+08	5.38897e+09	0.786902		2048	1.86273e+09	2.97473e+09	5.67791e+08	5.40525e+09	0.789279		2048	1.77318e+09	3.49704e+09	5.57714e+08	5.82793e+09	0.850999
	2049	1.85229e+09	2.91836e+09	5.63874e+08	5.33452e+09	0.778951		2049	1.84418e+09	2.94531e+09	5.57808e+08	5.3473e+09	0.780817		2049	1.75392e+09	3.45388e+09	5.47288e+08	5.75509e+09	0.840363
	2050	1.83307e+09	2.89129e+09	5.55002e+08	5.27935e+09	0.770896		2050	1.82475e+09	2.91804e+09	5.48273e+08	5.29107e+09	0.772606		2050	1.73468e+09	3.40897e+09	5.36597e+08	5.68024e+09	0.829433
	2051	1.81469e+09	2.86413e+09	5.46299e+08	5.22512e+09	0.762977		2051	1.80643e+09	2.8884e+09	5.38546e+08	5.23338e+09	0.764182		2051	1.71358e+09	3.36488e+09	5.25265e+08	5.60372e+09	0.81826
	2052	1.79735e+09	2.83617e+09	5.37826e+08	5.17135e+09	0.755124		2052	1.78731e+09	2.86141e+09	5.29065e+08	5.17779e+09	0.756065		2052	1.69177e+09	3.31706e+09	5.15104e+08	5.52394e+09	0.80661
	2053	1.77963e+09	2.80717e+09	5.29732e+08	5.11653e+09	0.74712		2053	1.76801e+09	2.83162e+09	5.19947e+08	5.11958e+09	0.747565		2053	1.67107e+09	3.27335e+09	505227563	5.44965e+09	0.795762
	2054	1.76159e+09	2.78249e+09	5.21131e+08	5.06522e+09	0.739627		2054	1.74874e+09	2.8031e+09	5.10338e+08	5.06217e+09	0.739183		2054	1.65205e+09	3.23292e+09	4.95654e+08	5.38062e+09	0.785683
	2055	1.74295e+09	2.7538e+09	5.12259e+08	5.00901e+09	0.73142		2055	1.72894e+09	2.77022e+09	5.01484e+08	5.00064e+09	0.730198		2055	1.63066e+09	3.18788e+09	4.86014e+08	5.30455e+09	0.774575
	2056	1.72561e+09	2.72395e+09	5.04222e+08	4.95379e+09	0.723356		2056	1.70982e+09	2.74082e+09	4.92547e+08	4.94319e+09	0.721808		2056	1.60869e+09	3.14029e+09	4.75639e+08	5.22462e+09	0.762903
	2057	1.7054e+09	2.69698e+09	4.97181e+08	4.89956e+09	0.715437		2057	1.68994e+09	2.71156e+09	4.83643e+08	4.88513e+09	0.713331		2057	1.58786e+09	3.09275e+09	4.65915e+08	5.14653e+09	0.7515
	2058	1.68728e+09	2.66991e+09	4.89681e+08	4.84687e+09	0.707743		2058	1.66992e+09	2.68267e+09	4.75212e+08	4.8278e+09	0.704959		2058	1.56666e+09	3.04372e+09	4.55395e+08	5.06578e+09	0.739709
	2059	1.66934e+09	2.64005e+09	4.81766e+08	4.79116e+09	0.699609		2059	1.64985e+09	2.65251e+09	4.66778e+08	4.76913e+09	0.696393		2059	1.54465e+09	2.99491e+09	4.44955e+08	4.98452e+09	0.727844
	2060	1.65047e+09	2.61376e+09	474306531	4.73854e+09	0.691925		2060	1.63033e+09	2.62258e+09	4.58367e+08	4.71128e+09	0.687944		2060	1.52329e+09	2.94614e+09	4.346e+08	4.90404e+09	0.716092
	2061	1.6316e+09	2.58666e+09	4.67266e+08	4.68553e+09	0.684185		2061	1.61101e+09	2.59237e+09	4.49933e+08	4.65332e+09	0.679481		2061	1.50147e+09	2.89331e+09	4.24719e+08	4.8195e+09	0.703747
	2062	1.61243e+09	2.55511e+09	4.60607e+08	4.62815e+09	0.675806		2062	1.59216e+09	2.56146e+09	4.41894e+08	4.59551e+09	0.671041		2062	1.47922e+09	2.84141e+09	4.15639e+08	4.73628e+09	0.691595
	2063	1.59511e+09	2.52648e+09	4.53236e+08	4.57482e+09	0.668019		2063	1.57345e+09	2.52763e+09	4.33334e+08	4.53441e+09	0.662118		2063	1.45861e+09	2.79658e+09	4.06257e+08	4.66145e+09	0.680668
	2064	1.57737e+09	2.49964e+09	4.46391e+08	4.52341e+09	0.660511		2064	1.55306e+09	2.49804e+09	4.25116e+08	4.47622e+09	0.653621		2064	1.4364e+09	2.74801e+09	3.96759e+08	4.58116e+09	0.668945
	2065	1.56024e+09	2.47076e+09	4.39103e+08	4.47011e+09	0.652729		2065	1.53339e+09	2.46518e+09	4.18093e+08	4.41666e+09	0.644924		2065	1.41472e+09	2.69636e+09	3.87151e+08	4.49823e+09	0.656835
	2066	1.54353e+09	2.44453e+09	4.32047e+08	4.42011e+09	0.645427		2066	1.51468e+09	2.43469e+09	4.10873e+08	4.36025e+09	0.636687		2066	1.39313e+09	2.64593e+09	3.77689e+08	4.41674e+09	0.644936
	2067	1.526e+09	2.41518e+09	4.24829e+08	4.36601e+09	0.637528		2067	1492662711	2.40442e+09	4.03286e+08	4.30037e+09	0.627943		2067	1.37127e+09	2.59416e+09	3.677e+08	4.33314e+09	0.632728
	2068	1.50763e+09	2.38839e+09	4.17868e+08	4.31389e+09	0.629918		2068	1.47274e+09	2.37326e+09	3.9583e+08	4.24182e+09	0.619394		2068	1.34805e+09	2.54284e+09	3.57995e+08	4.24888e+09	0.620425
	2069	1.49035e+09	2.3602e+09	4.11501e+08	4.26206e+09	0.622349		2069	1.45328e+09	2.34137e+09	3.88034e+08	4.18269e+09	0.61076		2069	1.32619e+09	2.49169e+09	3.48338e+08	4.16622e+09	0.608355
	2070	1.47289e+09	2.33393e+09	4.04648e+08	4.21147e+09	0.614963		2070	1.43627e+09	2.31101e+09	3.8064e+08	4.12792e+09	0.602762		2070	1.304e+09	2.44058e+09	3.3863e+08	4.08321e+09	0.596234
	2071	1.45678e+09	2.30548e+09	3.98362e+08	4.16063e+09	0.607538		2071	1.41652e+09	2.27826e+09	3.73219e+08	4.068e+09	0.594012		2071	1.28059e+09	2.38857e+09	3.29484e+08	3.99864e+09	0.583885
	2072	1.43923e+09	2.27867e+09	3.92024e+08	4.10992e+09	0.600134		2072	1.39672e+09	2.24746e+09	3.66303e+08	4.01048e+09	0.585613		2072	1.25768e+09	2.33609e+09	3.20265e+08	3.91404e+09	0.571531
	2073	1.42249e+09	2.25151e+09	3.85767e+08	4.05977e+09	0.592811		2073	1.37627e+09	2.21771e+09	3.59255e+08	3.95324e+09	0.577256		2073	1.23537e+09	2.28448e+09	3.11349e+08	3.8312e+09	0.559435
	2074	1.40478e+09	2.22203e+09	3.79794e+08	4.0066e+09	0.585047		2074	1.35704e+09	2.18679e+09	3.51924e+08	3.89575e+09	0.56886		2074	1.21306e+09	2.23424e+09	3.02945e+08	3.75024e+09	0.547613
	2075	1.38765e+09	2.19554e+09	3.74538e+08	3.95772e+09	0.57791		2075	1.33785e+09	2.15468e+09	3.44924e+08	3.83745e+09	0.560348		2075	1.189e+09	2.18355e+09	2.94227e+08	3.66677e+09	0.535425
	2076	1.37205e+09	2.16603e+09	3.68807e+08	3.90689e+09	0.570487		2076	1.31976e+09	2.12459e+09	3.38707e+08	3.78305e+09	0.552405		2076	1.16586e+09	2.1303e+09	2.8549e+08	3.58165e+09	0.522996
	2077	1.35789e+09	2.14076e+09	3.62953e+08	3.8616e+09	0.563874		2077	1.30263e+09	2.0924e+09	3.32511e+08	3.72754e+09	0.544298		2077	1.14279e+09	2.07904e+09	2.7642e+08	3.49826e+09	0.510818
	2078	1.34241e+09	2.11449e+09	3.57404e+08	3.8143e+09	0.556967		2078	1.28439e+09	2.0595e+09	3.25987e+08	3.66988e+09	0.535878		2078	1.12098e+09	2.02802e+09	2.68014e+08	3.41702e+09	0.498955
	2079	1.32719e+09	2.08871e+09	3.52376e+08	3.76828e+09	0.550247		2079	1.26572e+09	2.02801e+09	3.1925e+08	3.61299e+09	0.527571		2079	1.09885e+09	1.97854e+09	2.59465e+08	3.33685e+09	0.48725
	2080	1.31136e+09	2.06561e+09	3.47251e+08	3.72422e+09	0.543813		2080	1.24701e+09	1.99721e+09	3.13109e+08	3.55733e+09	0.519444		2080	1.075e+09	1.92766e+09	2.50672e+08	3.25334e+09	0.475055
	2081	1.29626e+09	2.03941e+09	3.41793e+08	3.67746e+09	0.536986		2081	1.22897e+09	1.9636e+09	3.06476e+08	3.49905e+09	0.510934		2081	1.05223e+09	1.87647e+09	2.42419e+08	3.17112e+09	0.463049
	2082	1.2812e+09	2.01688e+09	3.3675e+08	3.63484e+09	0.530762		2082	1.21091e+09	1.93086e+09	3.0033e+08	3.44211e+09	0.502619		2082	1.02893e+09	1.82464e+09	2.34117e+08	3.08768e+09	0.450866
	2083	1.26563e+09	1.99156e+09	3.31715e+08	3.58891e+09	0.524055		2083	1.19401e+09	1.898e+09	2.94241e+08	3.38625e+09	0.494462		2083	1.0065e+09	1.77368e+09	2.2622e+08	3.00641e+09	0.438998
	2084	1.25054e+09	1.96561e+09	3.26644e+08	3.5428e+09	0.517322		2084	1.17622e+09	1.86917e+09	2.87942e+08	3.33333e+09	0.486736		2084	9.82885e+08	1.72529e+09	2.18923e+08	2.92709e+09	0.427417
	2085	1.23512e+09	1.94289e+09	3.22515e+08	3.50052e+09	0.511149		2085	1.1597e+09	1.84029e+09	2.82271e+08	3.28225e+09	0.479277		2085	9.59814e+08	1.67849e+09	2.11713e+08	2.85002e+09	0.416162
	2086	1.22137e+09	1.91841e+09	3.17982e+08	3.45776e+09	0.504904		2086	1.14217e+09	1.80902e+09	2.76323e+08	3.22751e+09	0.471283		2086	9.37556e+08	1.6315e+09	2.04472e+08	2.77353e+09	0.404993
	2087	1.2068e+09	1.89291e+09	3.1326e+08	3.41298e+09	0.498366		2087	1.1248e+09	1.77931e+09	2.70857e+08	3.17497e+09	0.463612		2087	9.15032e+08	1.58663e+09	1.97417e+08	2.69908e+09	0.394122
	2088	1.1907e+09	1.86646e+09	3.08779e+08	3.36594e+09	0.491497		2088	1.10729e+09	1.75002e+09	2.65067e+08	3.12238e+09	0.455932		2088	8.9289e+08	1.5408e+09	1.90612e+08	2.62431e+09	0.383203
	2089	1.17544e+09	1.84534e+09	3.04509e+08	3.32529e+09	0.485562		2089	1.09109e+09	1.71977e+09	2.59823e+08	3.07068e+09	0.448383		2089	8.70499e+08	1.49386e+09	1.84112e+08	2.54847e+09	0.37213
	2090	1.1622e+09	1.82304e+09	299837210	3.28508e+09	0.47969		2090	1.07511e+09	1.68811e+09	2.54674e+08	3.01789e+09	0.440675		2090	8.47609e+08	1.44705e+09	1.77601e+08	2.47226e+09	0.361002
	2091	1.14721e+09	1.79948e+09	2.9516e+08	3.24186e+09	0.473379		2091	1.05806e+09	1.66002e+09	2.49435e+08	2.96751e+09	0.433318		2091	8.24968e+08	1.40104e+09	1.71332e+08	2.39734e+09	0.350061
	2092	1.13431e+09	1.77651e+09	2.90674e+08	3.20149e+09	0.467485		2092	1.04073e+09	1.63056e+09	2.43856e+08	2.91515e+09	0.425672		2092	8.02704e+08	1.35602e+09	1.65094e+08	2.32381e+09	0.339325
	2093	1.12032e+09	1.75143e+09	2.86762e+08	3.15851e+09	0.461209		2093	1.02383e+09	1.60216e+09	2.38922e+08	2.86491e+09	0.418336		2093	7.802e+08	1.31084e+09	1.59083e+08	2.25012e+09	0.328564
	2094	1.10605e+09	1.73269e+09	2.82833e+08	3.12157e+09	0.455814		2094	1.00653e+09	1.57529e+09	2.34233e+08	2.81606e+09	0.411203		2094	7.58944e+08	1.26857e+09	1.52861e+08	2.18038e+09	0.31838
	2095	1.09152e+09	1.71011e+09	2.79059e+08	3.08069e+09	0.449845		2095	9.89119e+08	1.54653e+09	2.29415e+08	2.76506e+09	0.403757		2095	7.37773e+08	1.22519e+09	1.47268e+08	2.11024e+09	0.308138
	2096	1.07768e+09	1.6906e+09	2.75142e+08	3.04342e+09	0.444403		2096	9.71748e+08	1.52092e+09	2.24573e+08	2.71725e+09	0.396774		2096	7.16042e+08	1.18432e+09	1.41509e+08	2.04187e+09	0.298155
	2097	1.06382e+09	1.66793e+09	2.71192e+08	3.00294e+09	0.438492		2097	9.55931e+08	1.49333e+09	2.20557e+08	2.66981e+09	0.389848		2097	6.95228e+08	1.1436e+09	1.35658e+08	1.97449e+09	0.288316
	2098	1.05044e+09	1.64567e+09	2.6754e+08	2.96364e+09	0.432754		2098	9.38749e+08	1.46529e+09	2.15992e+08	2.62003e+09	0.382579		2098	6.7391e+08	1.10492e+09	1.29994e+08	1.90882e+09	0.278728
	2099	1.03699e+09	1.62475e+09	2.63995e+08	2.92574e+09	0.427219		2099	9.22673e+08	1.43868e+09	2.11321e+08	2.57268e+09	0.375664		2099	6.52797e+08	1.06708e+09	1.24627e+08	1.8445e+09	0.269335
	2100	1.02422e+09	1.60533e+09	2.60297e+08	2.88985e+09	0.421978		2100	9.06812e+08	1.41129e+09	2.06802e+08	2.52491e+09	0.368689		2100	6.32896e+08	1.03073e+09	1.19166e+08	1.7828e+09	0.260325

[truncated: 2 more sheets: Table S11, Table S12]
